# Supplementary material for: Sex-determining genes distinctly regulate courtship capability and target preference via sexually dimorphic neurons
Source: eLife. 2020 Apr 21;9:e52701. doi: 10.7554/eLife.52701 (PMC7173972; doi:10.7554/eLife.52701)
Supplement: Source data 1. [file elife-52701-data1.xlsx]

## Sheet: Figure1B
Figure 1
	B (# of cells): ♂					B (# of cells): ♀
	pC1	pC2	pC3			pC1	pC2	pC3
	10	5	6			0	0	2
	6	5	4			0	1	0
	10	3	4			1	1	0
	11	6	7			1	1	0
	8	7	6			1	1	1
	9	4	4			0	0	1
	13	3	7			0	0	0
	10	7	7			1	0	1
	11	7	5			1	1	1
	8	7	6			1	0	1
	14	3	4
	12	5	5
	9	3	5
AVERAGE	10.0769	5	5.38462		AVERAGE	0.6	0.5	0.7
S.D.	2.17798	1.68325	1.19293		S.D.	0.516398	0.527046	0.674949

## Sheet: Figure1F,H
Figure 1
F1 (Time orienting (sec/min))							F2 (Lunges/minutes)							F3 (Wing extension (sec/min))							H1 (Time orienting (sec/min))							H2 (Lunges/minutes)							H3 (Wing extension (sec/min))
♂ dsxGAL4, UAS>stop>CsChrimson, fruFLP				♂ dsxGAL4, UAS>stop>CsChrimson	♂ UAS>stop>CsChrimson, fruFLP		♂ dsxGAL4, UAS>stop>CsChrimson, fruFLP				♂ dsxGAL4, UAS>stop>CsChrimson	♂ UAS>stop>CsChrimson, fruFLP		♂ dsxGAL4, UAS>stop>CsChrimson, fruFLP				♂ dsxGAL4, UAS>stop>CsChrimson	♂ UAS>stop>CsChrimson, fruFLP		♂ dsxGAL4, UAS>stop>CsChrimson, fruFLP				♂ dsxGAL4, UAS>stop>CsChrimson	♂ UAS>stop>CsChrimson, fruFLP		♂ dsxGAL4, UAS>stop>CsChrimson, fruFLP				♂ dsxGAL4, UAS>stop>CsChrimson	♂ UAS>stop>CsChrimson, fruFLP		♂ dsxGAL4, UAS>stop>CsChrimson, fruFLP				♂ dsxGAL4, UAS>stop>CsChrimson	♂ UAS>stop>CsChrimson, fruFLP
Window 1 (pre-stimulation)	Window 2 (during stimulation)	Window 3 (ISIs)	Window 4 (total post-stimulation)	Window 4 (total post-stimulation)	Window 4 (total post-stimulation)		Window 1 (pre-stimulation)	Window 2 (during stimulation)	Window 3 (ISIs)	Window 4 (total post-stimulation)	Window 4 (total post-stimulation)	Window 4 (total post-stimulation)		Window 1 (pre-stimulation)	Window 2 (during stimulation)	Window 3 (ISIs)	Window 4 (total post-stimulation)	Window 4 (total post-stimulation)	Window 4 (total post-stimulation)		Window 1 (pre-stimulation)	Window 2 (during stimulation)	Window 3 (ISIs)	Window 4 (total post-stimulation)	Window 4 (total post-stimulation)	Window 4 (total post-stimulation)		Window 1 (pre-stimulation)	Window 2 (during stimulation)	Window 3 (ISIs)	Window 4 (total post-stimulation)	Window 4 (total post-stimulation)	Window 4 (total post-stimulation)		Window 1 (pre-stimulation)	Window 2 (during stimulation)	Window 3 (ISIs)	Window 4 (total post-stimulation)	Window 4 (total post-stimulation)	Window 4 (total post-stimulation)
4.16667	29.95	17.4222	21.5981	5.12778	5.63519		0	7.66667	5.83333	6.44444	0	0		0.133333	18.8611	0.108333	6.35926	0	0		10.1333	36.9944	30.2333	32.487	20.1704	30.1389		0	0	0	0	0	0		0	18.5778	6.53056	10.5463	2.22963	9.73333
16.3667	46.1222	15.1278	25.4593	5.7963	3.10926		0	2.66667	5.5	4.55556	0	0		0	25.2222	0	8.40741	0	0		26.8167	54.95	46.7694	49.4963	37.75	37.7685		0	0	0	0	0	0		5.46667	10.4611	10.0389	10.1796	2.61296	13.2093
2.18333	35.4556	16.2028	22.6204	3.86296	4.71481		0	0.666667	1	0.888889	0	0		0	17.2833	0.369444	6.00741	0	0		6.1	27.2722	20.3111	22.6315	24.1315	29.6148		0	0	0	0	0	0		0	6.43889	1.1	2.87963	1.31111	5.07778
4.78333	53.65	33.0778	39.9352	5.1	6.51667		0	3	16.6667	12.1111	0	0		0	22.1778	0.0194444	7.40556	0	0		48.1	49.2611	51.7278	50.9056	16.2519	20.8019		0	0	0	0	0	0		11.15	14.9111	7.42778	9.92222	0.27037	6.42778
2.4	45.2833	26.0389	32.4537	4.82963	3.97593		0	0.333333	13.8333	9.33333	0	0		0	31.1556	0.694444	10.8481	0	0.0407407		40.7667	38.9444	54.825	49.5315	13.6259	16.5907		0	0	0	0	0	0		0	27.8889	3.325	11.513	0.581481	2.58148
6.08333	45.9056	21.0833	29.3574	8.28148	5.14444		0	18.6667	11.8333	14.1111	0	0		0	14.1389	0.127778	4.79815	0	0.0203704		34.7333	57.7222	35.3944	42.837	12.8222	16.9593		0	0	0	0	0	0		3.26667	30.1889	9.70833	16.5352	0.0462963	2.80556
2.6	15.9111	3.94444	7.93333	5.46667	3.35556		0	0.333333	0	0.111111	0	0		0	3.24444	0.0472222	1.11296	0	0		13.5	37.4722	33.2333	34.6463	41.6481	19.1944		0	0	0	0	0	0		0	32.0556	9.13611	16.7759	6.10185	0.944444
5.53333	20.4389	11.625	14.563	6.60185	3.57407		0	0.333333	1.66667	1.22222	0	0		0	3.53889	0	1.17963	0	0.0648148		4.33333	45.0889	29.7806	34.8833	31.8	33.9852		0	0	0	0	0	0		0	20.0444	5.60833	10.4204	10.1741	11.0259
6.16667	45.7611	18.2806	27.4407	5.97407	7.18519		0	13.3333	7.66667	9.55556	0	0		0	5.46667	0	1.82222	0	0		36.8667	55.9056	52.2389	53.4611	13.4111	17.2537		0	0	0	0	0	0		3.61667	36.4	14.3667	21.7111	1.22963	4.66296
6.08333	44.9278	21.7556	29.4796	7.28519	6.67778		0	8.66667	14.3333	12.4444	0	0		0	20.4722	0.0555556	6.86111	0	0		45.2167	48.5056	53.6139	51.9111	31.3204	12.4667		0	0	0	0	0	0		12.4333	28.8722	18.3056	21.8278	2.83333	1.46296
10.1667	46.0722	17.1722	26.8056	13.8	2.22593		0	6.33333	1.33333	3	0	0		0	17.7	0.530556	6.2537	0	0.05		8.25	27.9833	24.5667	25.7056	30.0241	14.2352		0	0	0	0	0	0		0	11.2389	4.09722	6.47778	4.0537	2.67222
3.25	46.45	10.8278	22.7019	4.54074	12.5444		0	10	2.33333	4.88889	0	0		0.1	17.9333	0	5.97778	0	0.148148		11.05	49.7667	50.4361	50.213	28.0685	42.5111		0	0	0	0	0	0		2.08333	33.45	22.8083	26.3556	4.01852	21.113
6.16667	43.3222	18.3333	26.663	11.5741	3.44074		0	25	4	11	0	0		0.15	9.37778	0.05	3.15926	0	0		9.45	52.0833	48.0861	49.4185	10.1074	8.65		0	0	0	0	0	0		0.383333	14.9889	8.79444	10.8593	0.138889	2.21852
9.26667	37.9611	25.1056	29.3907	5.90185	17.8463		0	4	6.83333	5.88889	0.111111	0.222222		0.316667	12.3056	0.680556	4.55556	0	0.464815		20.15	50.6722	47.4194	48.5037	36.1593	13.1537		0	0	0	0	0	0		2.08333	37.4167	13.0278	21.1574	2.63889	3.24259
3.78333	51.3889	23.5833	32.8519	5.61852	4.05556		0	14.6667	10.1667	11.6667	0.111111	0		0	11.8167	0	3.93889	0	0		16.0333	38.8167	39.7472	39.437	40.7944	14.513		0	0	0	0	0	0		0	24.8278	11.5611	15.9833	11.3037	4.03704
1.63333	2.38889	0.841667	1.35741	3.67963	18.787		0	4.33333	0.5	1.77778	0.111111	0		0	2.11111	0	0.703704	0	0		32.1833	52.9556	52.975	52.9685	21.8685	13.6907		0	0	0	0	0	0		0.766667	14.7556	14.75	14.7519	2.71852	1.15
5.26667	52.0111	27.1333	35.4259	3.39815	6.54074		0	2	2.66667	2.44444	0	0		0	24.2833	0.497222	8.42593	0	0		50.4833	59.3167	42.2583	47.9444	34.7593	5.47037		0	0	0	0	0	0		0.283333	11.3333	3.85556	6.34815	5.3963	2.38148
10.6167	39.6944	8.125	18.6481	4.49444	14.1296		0	3.33333	1.5	2.11111	0	0		0	11.6111	0.461111	4.17778	0	0.238889		19.7167	51.9167	43.6833	46.4278	31.5296	17.4148		0	0	0	0	0	0		1.7	14.6722	6.64444	9.32037	3.27963	7.26481
8.98333	30.8444	14.9722	20.263	3.49815	4.93148		0	1	0.166667	0.444444	0	0		0	3.16111	0	1.0537	0	0		33.4167	59.1389	57.6972	58.1778	35.8074	47.1926		0	0	0	0	0	0		2.95	33.0111	21.4444	25.3	8.68333	19.4333
10.6833	38.1611	19.5056	25.7241	5.6	11.25		0	4	3	3.33333	0	0		0	5.6	0.266667	2.04444	0	0.0203704		28	48.15	46.7972	47.2481	23.8185	50.5093		0	0	0	0	0	0		2.98333	39.6	13.0278	21.8852	4.00741	33.7296
2.73333	40.6722	25.9111	30.8315	5.94074	1.22407		0	7.66667	12.8333	11.1111	0	0		0	13.0667	0.122222	4.43704	0	0		3.96667	45.1278	22.6972	30.1741	9.05185	39.9185		0	0	0	0	0	0		0	14.4833	3.04722	6.85926	0.151852	30.2407
8.3	27.4389	8.77222	14.9944	11.1333	9.61111		0	2.66667	0.666667	1.33333	0	0		0	7.7	0.0305556	2.58704	0	0		1.85	33.8278	37.9222	36.5574	19.9907	27.7037		0	0	0	0	0	0		0	23.5111	10.3361	14.7278	1.11111	8.70556
3.4	38.2833	32.4972	34.4259	9.27963	4.68704		0	0	0	0	0	0		0	12.8556	2.02778	5.63704	0	0		16.6	49.5722	57.4278	54.8093	15.0315	52.6815		0	0	0	0	0	0		4.65	24.8944	25.4583	25.2704	0.357407	32.3574
12.1	9.48889	14.725	12.9796	5.90185	3.21296		0	0	0	0	0	0		0	0	0	0	0.012963	0		28.4167	59.6	55.4194	56.813	17.4537	35.0574		0	0	0	0	0	0		11.1	16.65	19.8194	18.763	1.96296	8.72037
2.71667	25.4944	7.6	13.5648	16.1	6.8		0	0	0.166667	0.111111	0	0		0	13.0167	0	4.33889	0.0222222	0		23.2	52.9611	47.6611	49.4278	45.0685	38.2185		0	0	0	0	0	0		3.76667	24.7444	15.5444	18.6111	20.6759	9.9963
4.93333	31.1111	15.0444	20.4	5.86852	3.15926		0	0	0	0	0	0		0	0.522222	1.29722	1.03889	0	0		18.4833	46.9	36.5361	39.9907	21.1259			0	0	0	0	0			3.88333	26.7611	10.3778	15.8389	4.23889
1.75	0	12.3333	8.22222	9.95926	7.57037		0	0	0	0	0	0		0	0	0.413889	0.275926	0	0		37.2333	57.3167	53.3778	54.6907	12.4556			0	0	0	0	0			4.93333	17.2833	7.81111	10.9685	1.24815
3.9	30.6444	16.7861	21.4056	9.90926	5.90185		0	0	0	0	0	0		0	24.2222	0.266667	8.25185	0	0
8.21667	42.0389	23.1889	29.4722	18.7093	3.81481		0	0	0	0	0	0		0	12.0889	1.71111	5.17037	0	0
2.48333	36.1167	27.6806	30.4926	5.79815	13.7037		0	5.66667	10.5	8.88889	0	0		0	9.27778	0.558333	3.46481	0	0		Within genotype dsxGAL4, UAS>stop>CsChrimson, fruFLP :							Within genotype dsxGAL4, UAS>stop>CsChrimson, fruFLP :							Within genotype dsxGAL4, UAS>stop>CsChrimson, fruFLP :
9.05	57.3667	24.0139	35.1315	6.86296			0	2	6.66667	5.11111	0			0.3	9.91667	0.105556	3.37593	0			Statistical comparisons among time windows 1-3							Statistical comparisons among time windows 1-3							Statistical comparisons among time windows 1-3
7.81667	21.9833	7.225	12.1444	14.0944			0	0	0	0	0			0	3.07778	0.205556	1.16296	0
5.45	5.26667	5.25833	5.26111				0	0	0	0				0	9.15556	0.836111	3.60926				Kruskal-Walis one-way ANOVA ('kruskalwallis') among windows 1-3							Kruskal-Walis one-way ANOVA ('kruskalwallis')							Kruskal-Walis one-way ANOVA ('kruskalwallis')
																					4.28753e-08							NaN							3.50723e-12
																					Wilcoxon signed rank test ('signrank')							Wilcoxon signed rank test ('signrank')							Wilcoxon signed rank test ('signrank')
Within genotype dsxGAL4, UAS>stop>CsChrimson, fruFLP :							Within genotype dsxGAL4, UAS>stop>CsChrimson, fruFLP :							Within genotype dsxGAL4, UAS>stop>CsChrimson, fruFLP :							1 vs. 2	2 vs. 3						1 vs. 2	2 vs. 3						1 vs. 2	2 vs. 3
Statistical comparisons among time windows 1-3							Statistical comparisons among time windows 1-3							Statistical comparisons among time windows 1-3							7.03341e-06	0.0101501													5.60612e-06	1.22804e-05
Kruskal-Walis one-way ANOVA ('kruskalwallis') among windows 1-3							Kruskal-Walis one-way ANOVA ('kruskalwallis')							Kruskal-Walis one-way ANOVA ('kruskalwallis')
2.40579e-12							2.02212e-09							4.44139e-15							Across-genotype comparison							Across-genotype comparison							Across-genotype comparison
Wilcoxon signed rank test ('signrank')							Wilcoxon signed rank test ('signrank')							Wilcoxon signed rank test ('signrank')
1 vs. 2	2 vs. 3						1 vs. 2	2 vs. 3						1 vs. 2	2 vs. 3						Kruskal-Walis one-way ANOVA ('kruskalwallis')							Kruskal-Walis one-way ANOVA ('kruskalwallis')							Kruskal-Walis one-way ANOVA ('kruskalwallis')
1.12174e-06	1.4692e-06						1.80724e-05	0.798221						1.17419e-06	1.05858e-06						1.9419e-07							NaN							1.23518e-07
																					Mann-Whitney U test ('ranksum')							Mann-Whitney U test ('ranksum')							Mann-Whitney U test ('ranksum')
																					dsxGAL4, UAS>stop>CsChrimson, fruFLP vs dsxGAL4, UAS>stop>CsChrimson							dsxGAL4, UAS>stop>CsChrimson, fruFLP vs dsxGAL4, UAS>stop>CsChrimson							dsxGAL4, UAS>stop>CsChrimson, fruFLP vs dsxGAL4, UAS>stop>CsChrimson
Across-genotype comparison							Across-genotype comparison							Across-genotype comparison							2.7754e-07														4.58252e-08
																					dsxGAL4, UAS>stop>CsChrimson, fruFLP vs UAS>stop>CsChrimson, fruFLP							dsxGAL4, UAS>stop>CsChrimson, fruFLP vs UAS>stop>CsChrimson, fruFLP							dsxGAL4, UAS>stop>CsChrimson, fruFLP vs UAS>stop>CsChrimson, fruFLP
Kruskal-Walis one-way ANOVA ('kruskalwallis')							Kruskal-Walis one-way ANOVA ('kruskalwallis')							Kruskal-Walis one-way ANOVA ('kruskalwallis')							1.20201e-05														0.0026679
1.37237e-10							4.19985e-12							1.38488e-16
Mann-Whitney U test ('ranksum')							Mann-Whitney U test ('ranksum')							Mann-Whitney U test ('ranksum')
dsxGAL4, UAS>stop>CsChrimson, fruFLP vs dsxGAL4, UAS>stop>CsChrimson							dsxGAL4, UAS>stop>CsChrimson, fruFLP vs dsxGAL4, UAS>stop>CsChrimson							dsxGAL4, UAS>stop>CsChrimson, fruFLP vs dsxGAL4, UAS>stop>CsChrimson
1.10015e-08							2.29837e-08							1.30226e-12
dsxGAL4, UAS>stop>CsChrimson, fruFLP vs UAS>stop>CsChrimson, fruFLP							dsxGAL4, UAS>stop>CsChrimson, fruFLP vs UAS>stop>CsChrimson, fruFLP							dsxGAL4, UAS>stop>CsChrimson, fruFLP vs UAS>stop>CsChrimson, fruFLP
8.44051e-09							1.35655e-08							2.15949e-11

## Sheet: Figure 1I
Figure 1I
	I1 (Time orienting (sec/min))						I2 (Lunges/min)						I3 (Wing extension (sec/min))
♂ dsxGAL4, UAS>stop>CsChrimson, fruFLP		Window 2 (during stimulation)		Window 4 (total post-stimulation)				Window 2 (during stimulation)		Window 4 (total post-stimulation)				Window 2 (during stimulation)		Window 4 (total post-stimulation)
	Target:	Wild-type ♂ (same as in Figure 1F1)	Wild-type ♀ (same as in Figure 1H1)	Wild-type ♂ (same as in Figure 1F1)	Wild-type ♀ (same as in Figure 1H1)		Target:	Wild-type ♂ (same as in Figure 1F2)	Wild-type ♀ (same as in Figure 1H2)	Wild-type ♂ (same as in Figure 1F2)	Wild-type ♀ (same as in Figure 1H2)		Target:	Wild-type ♂ (same as in Figure 1F3)	Wild-type ♀ (same as in Figure 1H3)	Wild-type ♂ (same as in Figure 1F3)	Wild-type ♀ (same as in Figure 1H3)
		29.95	36.9944	21.5981	32.487			7.66667	0	6.44444	0			18.8611	18.5778	6.35926	10.5463
		46.1222	54.95	25.4593	49.4963			2.66667	0	4.55556	0			25.2222	10.4611	8.40741	10.1796
		35.4556	27.2722	22.6204	22.6315			0.666667	0	0.888889	0			17.2833	6.43889	6.00741	2.87963
		53.65	49.2611	39.9352	50.9056			3	0	12.1111	0			22.1778	14.9111	7.40556	9.92222
		45.2833	38.9444	32.4537	49.5315			0.333333	0	9.33333	0			31.1556	27.8889	10.8481	11.513
		45.9056	57.7222	29.3574	42.837			18.6667	0	14.1111	0			14.1389	30.1889	4.79815	16.5352
		15.9111	37.4722	7.93333	34.6463			0.333333	0	0.111111	0			3.24444	32.0556	1.11296	16.7759
		20.4389	45.0889	14.563	34.8833			0.333333	0	1.22222	0			3.53889	20.0444	1.17963	10.4204
		45.7611	55.9056	27.4407	53.4611			13.3333	0	9.55556	0			5.46667	36.4	1.82222	21.7111
		44.9278	48.5056	29.4796	51.9111			8.66667	0	12.4444	0			20.4722	28.8722	6.86111	21.8278
		46.0722	27.9833	26.8056	25.7056			6.33333	0	3	0			17.7	11.2389	6.2537	6.47778
		46.45	49.7667	22.7019	50.213			10	0	4.88889	0			17.9333	33.45	5.97778	26.3556
		43.3222	52.0833	26.663	49.4185			25	0	11	0			9.37778	14.9889	3.15926	10.8593
		37.9611	50.6722	29.3907	48.5037			4	0	5.88889	0			12.3056	37.4167	4.55556	21.1574
		51.3889	38.8167	32.8519	39.437			14.6667	0	11.6667	0			11.8167	24.8278	3.93889	15.9833
		2.38889	52.9556	1.35741	52.9685			4.33333	0	1.77778	0			2.11111	14.7556	0.703704	14.7519
		52.0111	59.3167	35.4259	47.9444			2	0	2.44444	0			24.2833	11.3333	8.42593	6.34815
		39.6944	51.9167	18.6481	46.4278			3.33333	0	2.11111	0			11.6111	14.6722	4.17778	9.32037
		30.8444	59.1389	20.263	58.1778			1	0	0.444444	0			3.16111	33.0111	1.0537	25.3
		38.1611	48.15	25.7241	47.2481			4	0	3.33333	0			5.6	39.6	2.04444	21.8852
		40.6722	45.1278	30.8315	30.1741			7.66667	0	11.1111	0			13.0667	14.4833	4.43704	6.85926
		27.4389	33.8278	14.9944	36.5574			2.66667	0	1.33333	0			7.7	23.5111	2.58704	14.7278
		38.2833	49.5722	34.4259	54.8093			0	0	0	0			12.8556	24.8944	5.63704	25.2704
		9.48889	59.6	12.9796	56.813			0	0	0	0			0	16.65	0	18.763
		25.4944	52.9611	13.5648	49.4278			0	0	0.111111	0			13.0167	24.7444	4.33889	18.6111
		31.1111	46.9	20.4	39.9907			0	0	0	0			0.522222	26.7611	1.03889	15.8389
		0	57.3167	8.22222	54.6907			0	0	0	0			0	17.2833	0.275926	10.9685
		30.6444		21.4056				0		0				24.2222		8.25185
		42.0389		29.4722				0		0				12.0889		5.17037
		36.1167		30.4926				5.66667		8.88889				9.27778		3.46481
		57.3667		35.1315				2		5.11111				9.91667		3.37593
		21.9833		12.1444				0		0				3.07778		1.16296
		5.26667		5.26111				0		0				9.15556		3.60926
		Mann-Whitney U test ('ranksum')		Mann-Whitney U test ('ranksum')				Mann-Whitney U test ('ranksum')		Mann-Whitney U test ('ranksum')				Mann-Whitney U test ('ranksum')		Mann-Whitney U test ('ranksum')
		0.000203423		6.83319e-09				5.66101e-08		2.23221e-08				5.47641e-05		3.05335e-09

## Sheet: FigureS1-2B
Figure 1 - figure supplement 2
B1 (Lunges/minutes)							B2 (Wing extension (sec/min))							B3 (Headbutts/minutes)
♂ vs. ♂		♂ vs. ♀		♀ vs. ♀			♂ vs. ♂		♂ vs. ♀		♀ vs. ♀			♂ vs. ♂		♂ vs. ♀		♀ vs. ♀
♂	♂* (wing clipped)	♂	♀	♀	♀* (wing clipped)		♂	♂* (wing clipped)	♂	♀	♀	♀* (wing clipped)		♂	♂* (wing clipped)	♂	♀	♀	♀* (wing clipped)
2.7	12.0667	0	0	0	0		0.00611111	0.0227778	11.8156	0	0	0		0	0	0	0.0333333	0.8	0.8
0.166667	7.83333	0	0	0	0		0	0.0416667	1.09	0	0	0		0	0	0	0.5	2.76667	0.333333
1.7	3.63333	0	0	0	0		0	0.0105556	11.2778	0	0	0		0	0	0	0.0333333	0.133333	1.16667
0.166667	12.6667	0	0	0	0		0.01	0.0422222	10.0056	0	0	0		0	0	0	0.133333	0.5	0.566667
7.36667	1.06667	0	0	0	0		0.147778	0.0311111	8.93389	0	0	0		0	0	0	0.0333333	0.533333	0.766667
8.16667	1.33333	0	0	0	0		0.105	0.137778	10.615	0	0	0		0	0	0	0	0.433333	1.3
14.1333	1.83333	0	0	0	0		0.0544444	0.108333	3.855	0	0	0		0	0	0	0	0.233333	0.166667
0.1	9.86667	0	0	0	0		0.206111	0.109444	10.0161	0	0	0		0	0	0	0.1	0.333333	0.1
17.0667	0.766667	0	0	0	0		0.0461111	0.00666667	14.1528	0	0	0		0	0	0	0.0333333	0.366667	0.533333
2.53333	1.46667	0	0	0	0		0.0577778	0	7.55167	0	0	0		0	0	0	0.166667	0.133333	0.266667
4.2	0.433333	0.0333333	0	0	0		0.00888889	0.0833333	16.3656	0	0	0		0	0	0	0.0333333	0.3	0.833333
1.8	0.9	0	0	0	0		0.00444444	0	3.64667	0	0	0		0	0	0	0.0333333	0.333333	0.0666667
21.7	0.666667	0	0	0	0		0.144444	0.0455556	0.807778	0	0	0		0	0	0	0.1	0.866667	2.1
12.3333	1.1	0	0	0	0		0.101111	0.173889	13.1828	0	0	0		0	0	0	0.0333333	0.466667	1.26667
9.76667	1.7	0	0	0	0		0.173333	0.0438889	18.2317	0	0	0		0	0	0	0.2	0.333333	0.633333
0.3	18.4333	0	0	0	0		0.0233333	0.109444	7.62167	0	0	0		0	0	0	0	0.5	1.3
11.1	0.266667	0	0	0	0		0.358333	0.272778	13.1367	0	0	0		0	0	0	0.0333333	0.5	1.1
1.16667	9.96667	0	0	0	0		0.125	0.182778	12.0417	0	0	0		0	0	0	0	0.0333333	0.766667
0.566667	4.33333	0	0	0	0		0.005	0.0744444	8.21833	0	0	0		0	0.0333333	0	0.1	0.2	0.333333
0.9	2.7	0	0	0	0		0	0	8.38	0	0	0		0	0	0	0.0333333	0.4	0.566667
0.0333333	4.3	0	0	0	0		0	0.00833333	10.3533	0	0	0		0	0	0	0.0333333	0.6	1
1.4	3.93333	0	0	0	0		0.00388889	0.0555556	5.58111	0	0	0		0	0	0	0.0333333	0.366667	0.766667
2	6.63333	0	0	0	0		0.0283333	0.005	14.9283	0	0	0		0	0	0	0.0333333	0.533333	1.96667
15.9333	0.133333	0	0	0	0		0.025	0.0183333	0.866111	0	0	0		0	0	0	0.3	0.433333	1.46667
Wilcoxon signed rank test ('signrank')		Wilcoxon signed rank test ('signrank')		Wilcoxon signed rank test ('signrank')			Wilcoxon signed rank test ('signrank')		Wilcoxon signed rank test ('signrank')		Wilcoxon signed rank test ('signrank')			Wilcoxon signed rank test ('signrank')		Wilcoxon signed rank test ('signrank')		Wilcoxon signed rank test ('signrank')
0.668235		1		1			0.939386		1.82153e-05		1			1		5.74931e-05		0.00728944

## Sheet: FigureS1-3D
Figure 1 - figure supplement 3
D1 (Time orienting (sec/min))																					D2 (Lunges/minutes)																					D3 (Wing extension (sec/min))
30Hz							10Hz							2Hz							30Hz							10Hz							2Hz							30Hz							10Hz
♂ dsxGAL4, UAS>stop>CsChrimson, fruFLP				♂ dsxGAL4, UAS>stop>CsChrimson	♂ UAS>stop>CsChrimson, fruFLP		♂ dsxGAL4, UAS>stop>CsChrimson, fruFLP				♂ dsxGAL4, UAS>stop>CsChrimson	♂ UAS>stop>CsChrimson, fruFLP		♂ dsxGAL4, UAS>stop>CsChrimson, fruFLP				♂ dsxGAL4, UAS>stop>CsChrimson	♂ UAS>stop>CsChrimson, fruFLP		♂ dsxGAL4, UAS>stop>CsChrimson, fruFLP				♂ dsxGAL4, UAS>stop>CsChrimson	♂ UAS>stop>CsChrimson, fruFLP		♂ dsxGAL4, UAS>stop>CsChrimson, fruFLP				♂ dsxGAL4, UAS>stop>CsChrimson	♂ UAS>stop>CsChrimson, fruFLP		♂ dsxGAL4, UAS>stop>CsChrimson, fruFLP				♂ dsxGAL4, UAS>stop>CsChrimson	♂ UAS>stop>CsChrimson, fruFLP		♂ dsxGAL4, UAS>stop>CsChrimson, fruFLP				♂ dsxGAL4, UAS>stop>CsChrimson	♂ UAS>stop>CsChrimson, fruFLP		♂ dsxGAL4, UAS>stop>CsChrimson, fruFLP
Window 1 (pre-stimulation)	Window 2 (during stimulation)	Window 3 (ISIs)	Window 4 (total post-stimulation)	Window 4 (total post-stimulation)	Window 4 (total post-stimulation)		Window 1 (pre-stimulation)	Window 2 (during stimulation)	Window 3 (ISIs)	Window 4 (total post-stimulation)	Window 4 (total post-stimulation)	Window 4 (total post-stimulation)		Window 1 (pre-stimulation)	Window 2 (during stimulation)	Window 3 (ISIs)	Window 4 (total post-stimulation)	Window 4 (total post-stimulation)	Window 4 (total post-stimulation)		Window 1 (pre-stimulation)	Window 2 (during stimulation)	Window 3 (ISIs)	Window 4 (total post-stimulation)	Window 4 (total post-stimulation)	Window 4 (total post-stimulation)		Window 1 (pre-stimulation)	Window 2 (during stimulation)	Window 3 (ISIs)	Window 4 (total post-stimulation)	Window 4 (total post-stimulation)	Window 4 (total post-stimulation)		Window 1 (pre-stimulation)	Window 2 (during stimulation)	Window 3 (ISIs)	Window 4 (total post-stimulation)	Window 4 (total post-stimulation)	Window 4 (total post-stimulation)		Window 1 (pre-stimulation)	Window 2 (during stimulation)	Window 3 (ISIs)	Window 4 (total post-stimulation)	Window 4 (total post-stimulation)	Window 4 (total post-stimulation)		Window 1 (pre-stimulation)
2.6	29.8722	31.7861	31.1481	6.17222	10.1037		4.16667	42.6389	20.3917	27.8074	2.68519	5.2963		1.96667	50.1389	18.3722	28.9611	3.73889	4.04259		0	0	12	8	0	0		0	16.3333	6.33333	9.66667	0	0		0	4.33333	5	4.77778	0	0		0	29.3833	1.83056	11.0148	0	0		0
1.05	13.6722	28.6278	23.6426	3.13148	12.6944		1.2	31.1222	9.54444	16.737	17.6926	12.9981		3.98333	27.8333	11.9556	17.2481	5.57037	4.97963		0	0.333333	13.1667	8.88889	0	0		0	1	2.66667	2.11111	0	0		0	0	0	0	0	0		0	11.8444	0.194444	4.07778	0	0		0
1.61667	20.0222	21.6194	21.087	3.65185	9.28889		3.46667	28.9944	23.2833	25.187	1.50926	4.77222		0.216667	23.4222	2.57778	9.52593	10.5093	1.01852		0	0.666667	4.5	3.22222	0	0		0	2.33333	3.66667	3.22222	0	0		0	0	0	0	0	0		0.116667	7.13333	0.155556	2.48148	0	0.15		0
2.6	14.7444	14.1278	14.3333	7.06481	12.5185		4.65	33.7333	25.1694	28.0241	7.83889	9.93704		4.93333	23.55	22.3639	22.7593	7.37222	24.2167		0	0.333333	1.83333	1.33333	0	0		0	2.66667	10.8333	8.11111	0.111111	0		0	0	0	0	0	0		0.216667	13.2778	0.888889	5.01852	0	0.0833333		0
3.46667	17.6556	33.2639	28.0611	13.2685	2.37222		6.21667	30.3611	34.4222	33.0685	9.88704	6.1		1.73333	45.7444	15.1528	25.35	9.82222	14.7889		0	0	15.6667	10.4444	0	0		0	0.666667	6.5	4.55556	0	0		0	1.66667	1	1.22222	0	0		0	5.86111	0.169444	2.06667	0	0		0
27.85	19.0167	12.4083	14.6111	3.18889	8.51667		5.91667	26.7722	36.8528	33.4926	5.54074	5.91296		3.76667	30.2333	12.6528	18.513	3.97778	16.4944		0	0	1.66667	1.11111	0	0		0	1	12.6667	8.77778	0	0		0	0	0.333333	0.222222	0	0		0.266667	14.25	0.119444	4.82963	0.012963	0		0
6.8	24.5444	8.76389	14.0241	8.21481	13.8185		1.5	39.3611	27.4556	31.4241	6.22963	10.037		1.65	10.3111	9.10278	9.50556	3.83704	11.5352		0	0.333333	0	0.111111	0	0		0	7	8	7.66667	0	0		0	0	0	0	0	0.111111		0	16.5611	0.225	5.67037	0.0203704	0		0
0	4.06667	7.35556	6.25926	4.34259	7.52593		6.01667	38.9333	19.4778	25.963	9.64815	4.10556		8.33333	30.2778	23.0889	25.4852	6.66481	10.2704		0	0	0	0	0	0		0	2.33333	5.33333	4.33333	0	0		0	1.33333	4	3.11111	0	0		0	3.90556	0.830556	1.85556	0.0296296	0.507407		0
14.2667	29.7556	20.9028	23.8537	4.12963	11.7037		15.7667	36.6611	25.4778	29.2056	0.609259	6.60556		10.05	24.6778	6.16111	12.3333	4.35185	18.2389		0	1.33333	14	9.77778	0	0		0	8	11	10	0	0		0	0	0	0	0	0		0.45	11.8611	0.0916667	4.01481	0	2.54259		0
48.9	32.9778	38.2333	36.4815	4.50556	11.7593		11.9167	43.5167	24.0167	30.5167	7.65741	6.27963		2.53333	39.2167	21.4444	27.3685	5.60185	3.60185		0	0	27.1667	18.1111	0	0.555556		0	0	0.5	0.333333	0	0		0	3	1.66667	2.11111	0	0		0.3	41.0778	0.597222	14.0907	0	0.0981481		0
5.35	17.6778	28.3639	24.8019	4.44074	4.07407		10.6167	43.0722	21.7694	28.8704	1.56667	6.64074		7.26667	15.6389	3.22778	7.36481	6.26296	3.90741		0	0	5.5	3.66667	0	0		0	0.666667	5.5	3.88889	0	0		0	0	0	0	0	0		0.366667	23.8	2.275	9.45	0	0		0
2.11667	8.18333	20.7056	16.5315	11.4222	4.52222		6.46667	38.6333	26.1139	30.287	2.18889	7.04074		0.883333	46.8722	23.6778	31.4093	10.5463	9.41481		0	0	2.33333	1.55556	0	0		0	5.66667	17.8333	13.7778	0	0		0	0.666667	1.83333	1.44444	0	0		0.283333	20.3556	1.63056	7.87222	0	0		0
5.15	23.7333	10.3139	14.787	1.59444	1.24815		2.76667	27.2444	8.95556	15.0519	7.47593	4.39259		5.78333	5.45556	6.45278	6.12037	16.2574	4.47037		0	0	0.166667	0.111111	0	0		0	1.33333	0.166667	0.555556	0	0		0	0	0.166667	0.111111	0	0		0	8.45556	0.522222	3.16667	0	0		0
3.36667	29.2611	28.1972	28.5519	22.0037	15.7204		6.88333	45.5667	31.6972	36.3204	7.61667	2.9537		6.41667	42.3944	14.8694	24.0444	8.81111	9.2537		0	0.666667	0.5	0.555556	0	0		0	1.66667	5.83333	4.44444	0	0		0	3.33333	0.333333	1.33333	0	0		0	21.9722	1.575	8.37407	0	0		0.116667
8.48333	30.6333	23.8556	26.1148	6.2037	14.3185		5.61667	43.7389	33.5722	36.9611	5.48519	12.7796		15.9667	1.78889	3.575	2.97963	2.82963	3.32407		0	0.333333	4	2.77778	0	0		0	1.66667	13.3333	9.44444	0	0		0	0	0	0	0	0		0	11.0389	0.225	3.82963	0.012963	0		0
2.95	13.5944	13.7139	13.6741	6.77222	2.82037		8.18333	49.8778	19.8	29.8259	4.43704	17.5407		7.51667	34.9167	8.41944	17.2519	7.16667	6.56481		0	0	0	0	0	0		0	0	3.33333	2.22222	0	0		0	0.666667	0.166667	0.333333	0	0		0	9.41111	0.386111	3.39444	0	0		0
7.35	12.7833	7.86389	9.5037	5.32963	6.95		5.48333	34.7667	29.8667	31.5	4.85926	12.3519		16.8167	42.8444	17.1639	25.7241	2.57037	11.3		0	0	1.33333	0.888889	0	0		0	5.66667	8.16667	7.33333	0	0		0	2	2.33333	2.22222	0	0		0	10.0333	0.344444	3.57407	0	0		0
8.58333	25.7	13.7861	17.7574	7.51667	2.91111		3.55	3.25556	1.83333	2.30741	3.80185	6.76481		11.1	34.6167	15.175	21.6556	4.74444	12.0333		0	0.666667	0	0.222222	0	0		0	0	0	0	0	0		0	5	1.33333	2.55556	0	0		0.216667	23.2222	0.427778	8.02593	0	0		0
2.66667	10.3667	20.6667	17.2333	2.49259	6.35		2.21667	19.05	10.7333	13.5056	11.1537	9.66852		6.9	30.8722	3.57222	12.6722	7.23333	5.31296		0	0	3.83333	2.55556	0	0		0	2.66667	0	0.888889	0	0		0	0	0	0	0	0		0	9.31667	0.0333333	3.12778	0	0.0148148		0
0.85	12.2889	8.025	9.4463	5.9537	4.16296		0.483333	17.4389	3.925	8.42963	8.7	15.0963		8.25	22.5667	29.1472	26.9537	2.70556	6.50185		0	0	0.333333	0.222222	0	0		0	0	0	0	0	0		0	0	0	0	0	0		0	12.1333	0.222222	4.19259	0	0.305556		0
2.18333	26.0944	14.3778	18.2833	8.27222	8.27593		11.6167	15.55	12.4861	13.5074	12.1667	13.1593		9.08333	10.7	15.3028	13.7685	5.41296	10.8333		0	0	2.5	1.66667	0	0		0	0.333333	0	0.111111	0	0.111111		0	0	0	0	0	0		0.316667	23.35	0.147222	7.88148	0	0		0
7.75	7.22778	13.2306	11.2296	6.37963	14.5981		6.5	24.4889	7.01667	12.8407	13.8019	5.04815		1.21667	25.9833	3.95	11.2944	9.27593	5.09074		0	0	0.666667	0.444444	0	0		0	0	0	0	0	0		0	0	0	0	0	0		0	10.2	0.0277778	3.41852	0.012963	0		0
4.11667	12.1389	18.775	16.563	6.39259	11.7519		9.71667	49.6111	17.3111	28.0778		1.25741						7.15926			0	0	0.5	0.333333	0	0		0	0.333333	6.16667	4.22222		0						0			0	30.2556	1.52778	11.1037	0	0		0
15.2333	3.04444	2.80833	2.88704	11.963	11.3537		4.51667	35.8389	9.16111	18.0537											0	0	0	0	0	0		0	0	0	0											0	0	0	0	0	0		0.316667
2.73333	13.8722	13.3611	13.5315	13.8944	10.187																0	0.333333	0	0.111111	0	0																0	6.2	0.125	2.15	0	0.159259
3.23333	17.3611	17.7806	17.6407	4.78333	12.4426																0	0	0	0	0.111111	0																0	10.3167	0.886111	4.02963	0.0666667	0
6.08333	30.1	18.4861	22.3574	4.93889																	0	0	1.33333	0.888889	0																	0	12.2167	0	4.07222	0.0314815
3.06667	5.45556	21.5333	16.1741	8.68704																	0	0	1.66667	1.11111	0																	0.283333	9.11111	0.605556	3.44074	0
Within genotype dsxGAL4, UAS>stop>CsChrimson, fruFLP :							Within genotype dsxGAL4, UAS>stop>CsChrimson, fruFLP :							Within genotype dsxGAL4, UAS>stop>CsChrimson, fruFLP :							Within genotype dsxGAL4, UAS>stop>CsChrimson, fruFLP :							Within genotype dsxGAL4, UAS>stop>CsChrimson, fruFLP :							Within genotype dsxGAL4, UAS>stop>CsChrimson, fruFLP :							Within genotype dsxGAL4, UAS>stop>CsChrimson, fruFLP :							Within genotype dsxGAL4, UAS>stop>CsChrimson, fruFLP :
Statistical comparisons among time windows 1-3							Statistical comparisons among time windows 1-3							Statistical comparisons among time windows 1-3							Statistical comparisons among time windows 1-3							Statistical comparisons among time windows 1-3							Statistical comparisons among time windows 1-3							Statistical comparisons among time windows 1-3							Statistical comparisons among time windows 1-3
Kruskal-Walis one-way ANOVA ('kruskalwallis') among windows 1-3							Kruskal-Walis one-way ANOVA ('kruskalwallis')							Kruskal-Walis one-way ANOVA ('kruskalwallis')							Kruskal-Walis one-way ANOVA ('kruskalwallis') among windows 1-3							Kruskal-Walis one-way ANOVA ('kruskalwallis')							Kruskal-Walis one-way ANOVA ('kruskalwallis')							Kruskal-Walis one-way ANOVA ('kruskalwallis') among windows 1-3							Kruskal-Walis one-way ANOVA ('kruskalwallis')
2.75506e-07							6.18768e-10							2.92399e-07							4.72546e-09							1.15136e-07							0.00109421							3.47326e-13							1.02869e-12
Wilcoxon signed rank test ('signrank')							Wilcoxon signed rank test ('signrank')							Wilcoxon signed rank test ('signrank')							Wilcoxon signed rank test ('signrank')							Wilcoxon signed rank test ('signrank')							Wilcoxon signed rank test ('signrank')							Wilcoxon signed rank test ('signrank')							Wilcoxon signed rank test ('signrank')
1 vs. 2	2 vs. 3						1 vs. 2	2 vs. 3						1 vs. 2	2 vs. 3						1 vs. 2	2 vs. 3						1 vs. 2	2 vs. 3						1 vs. 2	2 vs. 3						1 vs. 2	2 vs. 3						1 vs. 2
0.000225163	0.927425						2.07056e-05	7.14429e-05						9.14929e-05	0.000333922						0.00390625	0.00014368						0.000194042	0.00510719						0.00390625	0.651367						5.60612e-06	5.60612e-06						1.82153e-05
Across-genotype comparison							Across-genotype comparison							Across-genotype comparison							Across-genotype comparison							Across-genotype comparison							Across-genotype comparison							Across-genotype comparison							Across-genotype comparison
Kruskal-Walis one-way ANOVA ('kruskalwallis')							Kruskal-Walis one-way ANOVA ('kruskalwallis')							Kruskal-Walis one-way ANOVA ('kruskalwallis')							Kruskal-Walis one-way ANOVA ('kruskalwallis')							Kruskal-Walis one-way ANOVA ('kruskalwallis')							Kruskal-Walis one-way ANOVA ('kruskalwallis')							Kruskal-Walis one-way ANOVA ('kruskalwallis')							Kruskal-Walis one-way ANOVA ('kruskalwallis')
2.09239e-08							2.91005e-08							7.16248e-06							5.14965e-13							1.04862e-10							8.39442e-06							6.83574e-13							3.11528e-12
Mann-Whitney U test ('ranksum')							Mann-Whitney U test ('ranksum')							Mann-Whitney U test ('ranksum')							Mann-Whitney U test ('ranksum')							Mann-Whitney U test ('ranksum')							Mann-Whitney U test ('ranksum')							Mann-Whitney U test ('ranksum')							Mann-Whitney U test ('ranksum')
dsxGAL4, UAS>stop>CsChrimson, fruFLP vs dsxGAL4, UAS>stop>CsChrimson							dsxGAL4, UAS>stop>CsChrimson, fruFLP vs dsxGAL4, UAS>stop>CsChrimson							dsxGAL4, UAS>stop>CsChrimson, fruFLP vs dsxGAL4, UAS>stop>CsChrimson							dsxGAL4, UAS>stop>CsChrimson, fruFLP vs dsxGAL4, UAS>stop>CsChrimson							dsxGAL4, UAS>stop>CsChrimson, fruFLP vs dsxGAL4, UAS>stop>CsChrimson							dsxGAL4, UAS>stop>CsChrimson, fruFLP vs dsxGAL4, UAS>stop>CsChrimson							dsxGAL4, UAS>stop>CsChrimson, fruFLP vs dsxGAL4, UAS>stop>CsChrimson							dsxGAL4, UAS>stop>CsChrimson, fruFLP vs dsxGAL4, UAS>stop>CsChrimson
1.37642e-07							4.00565e-07							4.75731e-06							2.35081e-09							1.91145e-07							0.000148687							2.5574e-10							1.29762e-09
dsxGAL4, UAS>stop>CsChrimson, fruFLP vs UAS>stop>CsChrimson, fruFLP							dsxGAL4, UAS>stop>CsChrimson, fruFLP vs UAS>stop>CsChrimson, fruFLP							dsxGAL4, UAS>stop>CsChrimson, fruFLP vs UAS>stop>CsChrimson, fruFLP							dsxGAL4, UAS>stop>CsChrimson, fruFLP vs UAS>stop>CsChrimson, fruFLP							dsxGAL4, UAS>stop>CsChrimson, fruFLP vs UAS>stop>CsChrimson, fruFLP							dsxGAL4, UAS>stop>CsChrimson, fruFLP vs UAS>stop>CsChrimson, fruFLP							dsxGAL4, UAS>stop>CsChrimson, fruFLP vs UAS>stop>CsChrimson, fruFLP							dsxGAL4, UAS>stop>CsChrimson, fruFLP vs UAS>stop>CsChrimson, fruFLP
3.07801e-06							6.72262e-07							0.000376397							1.28753e-08							1.15842e-07							0.000612731							1.34029e-09							1.05557e-08
[truncated: 11 more columns]

## Sheet: FigureS1-3E
Figure 1 - figure supplement 3
E1 (Time orienting (sec/min))							E2 (Lunges/minutes)							E3 (Wing extension (sec/min))
30Hz							30Hz							30Hz
♂ dsxGAL4, UAS>stop>CsChrimson, fruFLP				♂ dsxGAL4, UAS>stop>CsChrimson	♂ UAS>stop>CsChrimson, fruFLP		♂ dsxGAL4, UAS>stop>CsChrimson, fruFLP				♂ dsxGAL4, UAS>stop>CsChrimson	♂ UAS>stop>CsChrimson, fruFLP		♂ dsxGAL4, UAS>stop>CsChrimson, fruFLP				♂ dsxGAL4, UAS>stop>CsChrimson	♂ UAS>stop>CsChrimson, fruFLP
Window 1 (pre-stimulation)	Window 2 (during stimulation)	Window 3 (ISIs)	Window 4 (total post-stimulation)	Window 4 (total post-stimulation)	Window 4 (total post-stimulation)		Window 1 (pre-stimulation)	Window 2 (during stimulation)	Window 3 (ISIs)	Window 4 (total post-stimulation)	Window 4 (total post-stimulation)	Window 4 (total post-stimulation)		Window 1 (pre-stimulation)	Window 2 (during stimulation)	Window 3 (ISIs)	Window 4 (total post-stimulation)	Window 4 (total post-stimulation)	Window 4 (total post-stimulation)
31.6333	45.6556	41.9528	43.187	21.8463	7.69815		0	0	0	0	0	0		3.71667	40.9444	5.73333	17.4704	0.122222	0.161111
29.4667	48.4167	53.8667	52.05	26.6019	13.8296		0	0	0	0	0	0		6.31667	24.4056	21.3694	22.3815	2.61111	3.48704
39.7833	23.6333	35.2389	31.3704	21.0907	21.3704		0	0	0	0	0	0		3.75	14.5611	8.65556	10.6241	0.272222	6.28889
2.08333	29.8222	42.7083	38.413	15.1963	23.6685		0	0	0	0	0	0		0.216667	27.7333	6.37778	13.4963	0	5.67407
24.3833	15.2833	19.2667	17.9389	31.6704	17.9778		0	0	0	0	0	0		1.25	18.4111	2.24444	7.63333	5.55	2.68148
39.8167	34.25	30.3	31.6167	6.14444	10.0315		0	0	0	0	0	0		10.3667	27.9667	4.90278	12.5907	0.087037	0.948148
42.9167	16.4722	39.0889	31.55	26.163	14.9093		0	0	0	0	0	0		6.46667	20.65	17.7056	18.687	1.30741	2.04259
2.86667	28.4889	37.0944	34.2259	25.7889	8.75741		0	0	0	0	0	0		0	30.6222	4.58611	13.2648	4.65741	2.21296
23.3667	26.0278	36.925	33.2926	9.95185	39.3944		0	0	0	0	0	0		1.15	21.9389	6.98333	11.9685	1.10741	21.65
39.6167	52.9	53	52.9667	38.9167	12.2278		0	0	0	0	0	0		2.21667	24.8778	9.825	14.8426	0.0962963	5.38519
6.06667	20.9	20.3028	20.5019	23.3222	33.1389		0	0	0	0	0	0		0	6.86667	0	2.28889	2.37593	13.0333
0.133333	37.0167	46.3028	43.2074	21.737	36.7519		0	0	0	0	0	0		3.15	38.1778	2.07778	14.1111	4.01111	18.7648
36.0167	43.5889	50.925	48.4796	14.2889	35.5907		0	0	0	0	0	0		6.6	28.2333	19.35	22.3111	1.63704	9.88704
14.8	23.0556	48.6861	40.1426	24.3056	18.5741		0	0	0	0	0	0		0.35	21.3778	15.6083	17.5315	1.37037	2.58333
27.1167	34.6611	51.1194	45.6333	20.4704	24.1685		0	0	0	0	0	0		5.15	15.9167	26.2972	22.837	1.05185	7.47222
3.46667	42.0722	58.1583	52.7963	27.3907	5.15185		0	0	0	0	0	0		0	8.66667	2.87222	4.8037	4.7463	0.714815
3.85	19.7056	37.3472	31.4667	25.9759	37.6796		0	0	0	0	0	0		0	16.7056	10.9028	12.837	0.466667	19.4352
11.6	20.7611	33.8167	29.4648	42.1759	23.5426		0	0	0	0	0	0		0.0166667	15.9333	12.1333	13.4	6.1	7.82407
41.3333	13.9167	43.3083	33.5111	26.1574	33.9796		0	0	0	0	0	0		10.5833	12.95	10.9889	11.6426	1.72037	12.8926
25.8833	36.8111	47.3111	43.8111	41.2037	29.9019		0	0	0	0	0	0		6.26667	30.5333	10.1694	16.9574	1.73519	15.0426
6.46667	12.5444	15.2556	14.3519	13.2833	15.5481		0	0	0	0	0	0		1.36667	39.8278	10.8778	20.5278	2.15185	9.23889
35.4167	12.1944	30.6333	24.487	23.537	43.5889		0	0	0	0	0	0		13.0167	20.0222	12.6444	15.1037	3.53148	20.0593
17.5333	26.5389	36.1056	32.9167	20.3167	42.5352		0	0	0	0	0	0		0.45	10.7333	5.69167	7.37222	1.51111	24.5815
22.4333	43.9611	46.4556	45.6241	13.8815	12.2704		0	0	0	0	0	0		2.88333	30.8278	14.3556	19.8463	0.975926	1.33704
2.86667	44.4778	43.7083	43.9648		28.2685		0	0	0	0		0		0	39.9056	12.2639	21.4778		10.9741
37.3833	20.5222	37.2389	31.6667		25.1185		0	0	0.166667	0.111111		0		2.83333	19.6833	4.56667	9.60556		11.5093
40.4667	33.3389	51.85	45.6796		24.7278		0	0	0	0		0		4.7	25.7611	10.9361	15.8778		4.92963
Within genotype dsxGAL4, UAS>stop>CsChrimson, fruFLP :							Within genotype dsxGAL4, UAS>stop>CsChrimson, fruFLP :							Within genotype dsxGAL4, UAS>stop>CsChrimson, fruFLP :
Statistical comparisons among time windows 1-3							Statistical comparisons among time windows 1-3							Statistical comparisons among time windows 1-3
Kruskal-Walis one-way ANOVA ('kruskalwallis') among windows 1-3							Kruskal-Walis one-way ANOVA ('kruskalwallis')							Kruskal-Walis one-way ANOVA ('kruskalwallis')
7.74408e-05							0.367879							9.1601e-12
Wilcoxon signed rank test ('signrank')														Wilcoxon signed rank test ('signrank')
1 vs. 2	2 vs. 3													1 vs. 2	2 vs. 3
0.0678653	3.98626e-05													5.60612e-06	2.35359e-05
Across-genotype comparison							Across-genotype comparison							Across-genotype comparison
Kruskal-Walis one-way ANOVA ('kruskalwallis')							Kruskal-Walis one-way ANOVA ('kruskalwallis')							Kruskal-Walis one-way ANOVA ('kruskalwallis')
2.94213e-05							0.388896							2.14598e-09
Mann-Whitney U test ('ranksum')														Mann-Whitney U test ('ranksum')
dsxGAL4, UAS>stop>CsChrimson, fruFLP vs dsxGAL4, UAS>stop>CsChrimson														dsxGAL4, UAS>stop>CsChrimson, fruFLP vs dsxGAL4, UAS>stop>CsChrimson
3.4392e-05														3.2957e-09
dsxGAL4, UAS>stop>CsChrimson, fruFLP vs UAS>stop>CsChrimson, fruFLP														dsxGAL4, UAS>stop>CsChrimson, fruFLP vs UAS>stop>CsChrimson, fruFLP
0.000213742														0.00246589

## Sheet: Figure2A,B
Figure 2
A1 (Time orienting (sec/min))							A2 (Lunges/minutes)							A3 (Wing extension (sec/min))							B1 (Time orienting (sec/min))							B2 (Lunges/minutes)							B3 (Wing extension (sec/min))
♂ NP2631, UAS>stop>CsChrimson, dsxFLP				♂ NP2631, UAS>stop>CsChrimson	♂ UAS>stop>CsChrimson, dsxFLP		♂ NP2631, UAS>stop>CsChrimson, dsxFLP				♂ NP2631, UAS>stop>CsChrimson	♂ UAS>stop>CsChrimson, dsxFLP		♂ NP2631, UAS>stop>CsChrimson, dsxFLP				♂ NP2631, UAS>stop>CsChrimson	♂ UAS>stop>CsChrimson, dsxFLP		♂ NP2631, UAS>stop>CsChrimson, dsxFLP				♂ NP2631, UAS>stop>CsChrimson	♂ UAS>stop>CsChrimson, dsxFLP		♂ NP2631, UAS>stop>CsChrimson, dsxFLP				♂ NP2631, UAS>stop>CsChrimson	♂ UAS>stop>CsChrimson, dsxFLP		♂ NP2631, UAS>stop>CsChrimson, dsxFLP				♂ NP2631, UAS>stop>CsChrimson	♂ UAS>stop>CsChrimson, dsxFLP
Window 1 (pre-stimulation)	Window 2 (during stimulation)	Window 3 (ISIs)	Window 4 (total post-stimulation)	Window 4 (total post-stimulation)	Window 4 (total post-stimulation)		Window 1 (pre-stimulation)	Window 2 (during stimulation)	Window 3 (ISIs)	Window 4 (total post-stimulation)	Window 4 (total post-stimulation)	Window 4 (total post-stimulation)		Window 1 (pre-stimulation)	Window 2 (during stimulation)	Window 3 (ISIs)	Window 4 (total post-stimulation)	Window 4 (total post-stimulation)	Window 4 (total post-stimulation)		Window 1 (pre-stimulation)	Window 2 (during stimulation)	Window 3 (ISIs)	Window 4 (total post-stimulation)	Window 4 (total post-stimulation)	Window 4 (total post-stimulation)		Window 1 (pre-stimulation)	Window 2 (during stimulation)	Window 3 (ISIs)	Window 4 (total post-stimulation)	Window 4 (total post-stimulation)	Window 4 (total post-stimulation)		Window 1 (pre-stimulation)	Window 2 (during stimulation)	Window 3 (ISIs)	Window 4 (total post-stimulation)	Window 4 (total post-stimulation)	Window 4 (total post-stimulation)
1.15	30.7833	11.8194	18.1407	6.6963	6.69815		0	0.666667	0.333333	0.444444	0	0		0	4.49444	0.419444	1.77778	0.125926	0.374074		4.26667	36.3278	38.4528	37.7444	5.89444	17.2667		0	0	0	0	0	0		1.1	22.2389	19.9361	20.7037	0.116667	1.58704
12.5	39.4667	12.85	21.7222	2.56296	7.01852		0	29.6667	4	12.5556	0	0		0	2.86667	0.394444	1.21852	0.12037	0.192593		3.61667	41.4333	34.9389	37.1037	13.4037	11.9944		0	0	0	0	0	0		4.38333	19.1833	9.54722	12.7593	0.853704	1.84259
2.76667	42.3056	11.2667	21.613	33.7185	2.88889		0	7.33333	0.333333	2.66667	0	0		0	3.95556	0.494444	1.64815	13.0241	0.0351852		12.7333	41.0167	27.1694	31.7852	18.1111	12.5611		0	0	0	0	0	0		1.48333	14.9722	9.85	11.5574	1.43889	2.17963
8.16667	21.9667	11.8611	15.2296	6.88889	5.03333		0	9.66667	3.16667	5.33333	0	0		0	0.272222	0	0.0907407	0.0851852	0		9.25	17.1722	20.2278	19.2093	10.7796	17.8556		0	0	0	0	0	0		0.15	5.11111	1.87222	2.95185	0.75	3.65
6.68333	25.1611	26.0833	25.7759	4.67407	6.17037		0	4.33333	10.3333	8.33333	0	0		0.566667	0.611111	1.05833	0.909259	0.403704	0.0259259		6.43333	16.3611	8.15833	10.8926	5.70185	13.6093		0	0	0	0	0	0		3.31667	4.84444	1.80278	2.81667	1.3037	1.41296
7.33333	32.9056	11.5972	18.7	4.02222	3.42593		0	7.66667	0.333333	2.77778	0	0		1.48333	10.5	1.43889	4.45926	0.0314815	0		3.73333	1.97222	10.1833	7.4463	32.6148	14.2444		0	0	0	0	0	0		2.61667	2.48889	2.11111	2.23704	2.19074	2.65
7.35	39.4056	16.6167	24.213	10.5463	5.32407		0	11.6667	9.66667	10.3333	0	0		0	2.79444	0.647222	1.36296	0.366667	0.0796296		36.6833	51.1333	58.0583	55.75	9.28333	42.437		0	0	0	0	0	0		24.6167	26.0833	31.2111	29.5019	1.05185	32.4185
7.43333	19.9111	19.9889	19.963	5.15741	6.26481		0	5	7.16667	6.44444	0	0		0.333333	2.79444	0	0.931481	0	0.0685185		13.3833	44.45	36.5861	39.2074	47.0463	9.62222		0	0	0	0	0	0		4.11667	25.6056	20.1028	21.937	30.8685	0.416667
3.83333	19	7.43333	11.2889	9.59259	1.78148		0	12	1	4.66667	0	0		0	1.53889	0.4	0.77963	0.57963	0.0666667		1.2	21.8556	6.42222	11.5667	1.29444	47.3796		0	0	0	0	0	0		1.46667	1.06111	0.583333	0.742593	0.198148	25.1537
2.86667	28.6833	9.90833	16.1667	6.79074	22.0963		0	5.66667	0.666667	2.33333	0	0		0	2.68333	0.352778	1.12963	0.0277778	6.15556		1.28333	47.0222	43.8889	44.9333	45.7241	50.0019		0	0	0	0	0	0		0	17.1056	22.9889	21.0278	26.613	28.7963
8.38333	47.9333	28.5056	34.9815	8.51852	3.43333		0	4	4.33333	4.22222	0	0		2.01667	16.7167	4.62222	8.6537	0.268519	0.0981481		20.7333	45.9444	32.5694	37.0278	28.1778	23.4981		0	0	0	0	0	0		2.3	17.4389	8.66944	11.5926	0.957407	3.5537
3.48333	15.2111	8.43889	10.6963	8.1463	8.96481		0	5.66667	2.33333	3.44444	0	0		0	0.444444	0.280556	0.335185	0.240741	0		24.5667	23.2667	24.6167	24.1667	35.0296	45.3111		0	0	0	0	0	0		8.06667	12.6167	5.06667	7.58333	1.26111	22.7352
7.45	47.3833	32.7583	37.6333	3.96481	8.13704		0	18	11.1667	13.4444	0	0		2.26667	4.6	1.64167	2.62778	0	0.464815		13.2	29.8056	10.4417	16.8963	19.2019	24.6963		0	0	0	0	0	0		4.06667	4.95	1.6	2.71667	1.10185	4.32593
3.53333	35.1611	23.8278	27.6056	15.037	10.0037		0	8	13.1667	11.4444	0	0		0	12.5889	1.06667	4.90741	0.424074	0.159259		10.6167	51.8833	46.8806	48.5481	5.44444	49.8667		0	0	0	0	0	0		2.1	21.2833	27.4861	25.4185	1.02407	36.313
4.15	30.65	9.37778	16.4685	6.1463	2.91296		0	26	3.5	11	0	0		0	2.14444	0.269444	0.894444	0	0.0240741		14.8333	53.1444	41.6556	45.4852	31.2185	15.4704		0	0	0	0	0	0		12.0167	31.0222	22.8028	25.5426	1.57222	1.85556
3.76667	39.3944	17.7528	24.9667	4.51296	5.65741		0	15.6667	6.33333	9.44444	0	0		0	0.872222	0.641667	0.718519	0.114815	0.0240741		36.1333	39.4	25.0278	29.8185	13.5759	49.0241		0	0	0	0	0	0		13.5833	21.0667	15.4917	17.35	2.04259	33.463
6.01667	20.9889	5.10833	10.4019	20.3	4.70926		0	0.666667	0	0.222222	0	0		0.183333	3.11667	0.797222	1.57037	0.792593	0		0	9.83889	10.8278	10.4981	25.7667	31.0444		0	0	0	0	0	0		0	1.05556	2.70278	2.1537	7.92407	12.8556
15.6833	41.2222	15.1278	23.8259	6.62963	14.1389		0	7.66667	0.166667	2.66667	0	0		0	4.13333	0.430556	1.66481	0	0		40.6333	49.1444	46.2528	47.2167	17.3833	6.02037		0	0	0	0	0	0		19.2333	28.0889	18.6472	21.7944	1.73889	1.06852
5.35	54.6444	21.8361	32.7722	5.64815	8.76296		0	0.333333	0	0.111111	0	0		0.583333	5.00556	0.6	2.06852	0.1	1.15926		9.88333	34.2111	32.8389	33.2963	13.5389	39.7519		0	0	0	0	0	0		0.75	2.37778	0.780556	1.31296	0.959259	29.7389
10.4667	13.3167	7.08056	9.15926	9.26481	9.4463		0	0.666667	0.5	0.555556	0	0		0	1.32778	0.183333	0.564815	0.0685185	0		35.6833	36.0056	8.10833	17.4074	19.1222	35.2833		0	0	0	0	0	0		4.31667	10.7444	1.45833	4.5537	1.48519	2.41852
5.56667	41.3778	7.72778	18.9444	5.8537	7.82407		0	5	0	1.66667	0	0		0	6.5	0.0388889	2.19259	0.0962963	0.12963		13.1833	36.8611	23.8972	28.2185	26.7741	14.9759		0	0	0	0	0	0		3.11667	10.5611	3.37778	5.77222	0.475926	1.70926
16.6333	45.7389	27.5361	33.6037	7.8463	7.78704		0	4.66667	0.833333	2.11111	0	0		0	3.71111	0.641667	1.66481	0.159259	0		39.7167	45.6	49.0833	47.9222	13.3556	24.8704		0	0	0	0	0	0		19.4	29.8889	30.8194	30.5093	0.087037	0.531481
1.23333	35.9056	17.3028	23.5037	4.40185	7.67222		0	1.66667	0	0.555556	0	0		0	1.65	0.377778	0.801852	0	0		41.1833	14.0944	25.7528	21.8667	10.4056	36.9407		0	0	0	0	0	0		3.03333	5.13889	5.39444	5.30926	0.651852	25.3222
1.86667	22.1722	33.0306	29.4111	10.6278	11.887		0	6.66667	2.33333	3.77778	0	0		0	1.84444	0.575	0.998148	0	2.07407		29.5667	52.6722	51.1861	51.6815	15.6481	30.6204		0	0	0	0	0	0		20.3333	22.8556	20.225	21.1019	0.861111	11.1481
5	51.2333	14.9528	27.0463	5.80926	3.38519		0	3	1.5	2	0	0		0.55	25.1333	1.18889	9.17037	0.268519	0		29.5	39.6333	43.1917	42.0056				0	0	0	0				2.05	17.8667	11.4778	13.6074
9.15	27.8278	13.8833	18.5315				0	0.333333	0.333333	0.333333				0	4.56111	0.336111	1.74444				6.3	32.3611	23.7639	26.6296				0	0	0	0				0	21.8	1.72778	8.41852
10.2	48.3833	19.85	29.3611				0	10	1.66667	4.44444				0	0.533333	0.433333	0.466667				0.966667	44.0833	39.025	40.7111				0	0	0	0				0	30.7167	22.0139	24.9148
10.55	45.5778	15.1861	25.3167				0	24.6667	2.16667	9.66667				0.216667	2.77222	0.841667	1.48519				12.0333	27.5444	17.0917	20.5759				0	0	0	0				5.33333	20	8.70833	12.4722
12.55	43.2389	19.4472	27.3778				0	8	0.5	3				0	5.96111	0.272222	2.16852				21.85	40.4889	14.4556	23.1333				0	0	0	0				3.23333	29.6278	2.7	11.6759
2.5	48.2722	21.6361	30.5148				0	6.33333	1.5	3.11111				0	2.01667	0.258333	0.844444				17.4333	30.7833	45.7028	40.7296				0	0	0	0				4.6	21.4889	19.875	20.413
4.86667	37.1111	8.41111	17.9778				0	1.66667	0.833333	1.11111				0	7.16111	0.0777778	2.43889				8.15	26.3278	14.6694	18.5556				0	0	0	0				0	8.12222	1.64444	3.8037
																					34.1333	33.6611	29.9056	31.1574				0	0	0	0				5.45	16.4778	5.72778	9.31111
																					36.15	35.0611	33.8528	34.2556				0	0	0	0				19.9667	21.2778	20.4194	20.7056
Within genotype NP2631, UAS>stop>CsChrimson, dsxFLP :							Within genotype NP2631, UAS>stop>CsChrimson, dsxFLP :							Within genotype NP2631, UAS>stop>CsChrimson, dsxFLP :							21.1333	51.9056	33.6833	39.7574				0	0	0	0				9.61667	21.2611	15.3722	17.3352
Statistical comparisons among time windows 1-3							Statistical comparisons among time windows 1-3							Statistical comparisons among time windows 1-3							12.4	16.9722	26.2528	23.1593				0	0	0	0				3.48333	7.60556	3.8	5.06852
																					26.5167	24.0444	9.64167	14.4426				0	0	0	0				0.866667	9.82222	5.19444	6.73704
Kruskal-Walis one-way ANOVA ('kruskalwallis') among windows 1-3							Kruskal-Walis one-way ANOVA ('kruskalwallis')							Kruskal-Walis one-way ANOVA ('kruskalwallis')							14.55	17.4556	11.7583	13.6574				0	0	0	0				0	6.57222	3.85556	4.76111
6.71112e-15							1.07376e-14							5.1843e-13
Wilcoxon signed rank test ('signrank')							Wilcoxon signed rank test ('signrank')							Wilcoxon signed rank test ('signrank')
1 vs. 2	2 vs. 3						1 vs. 2	2 vs. 3						1 vs. 2	2 vs. 3						Within genotype NP2631, UAS>stop>CsChrimson, dsxFLP :							Within genotype NP2631, UAS>stop>CsChrimson, dsxFLP :							Within genotype NP2631, UAS>stop>CsChrimson, dsxFLP :
1.17419e-06	2.81915e-06						1.16729e-06	0.00014155						1.17419e-06	5.53966e-05						Statistical comparisons among time windows 1-3							Statistical comparisons among time windows 1-3							Statistical comparisons among time windows 1-3
																					Kruskal-Walis one-way ANOVA ('kruskalwallis') among windows 1-3							Kruskal-Walis one-way ANOVA ('kruskalwallis')							Kruskal-Walis one-way ANOVA ('kruskalwallis')
Across-genotype comparison							Across-genotype comparison							Across-genotype comparison							1.85015e-05							N/A							5.97136e-06
																					Wilcoxon signed rank test ('signrank')														Wilcoxon signed rank test ('signrank')
Kruskal-Walis one-way ANOVA ('kruskalwallis')							Kruskal-Walis one-way ANOVA ('kruskalwallis')							Kruskal-Walis one-way ANOVA ('kruskalwallis')							1 vs. 2	2 vs. 3													1 vs. 2	2 vs. 3
9.14682e-11							7.94e-17							1.98275e-09							4.67902e-06	0.00310694													1.45971e-07	3.23483e-05
Mann-Whitney U test ('ranksum')							Mann-Whitney U test ('ranksum')							Mann-Whitney U test ('ranksum')
NP2631, UAS>stop>CsChrimson, dsxFLP vs. NP2631, UAS>stop>CsChrimson							NP2631, UAS>stop>CsChrimson, dsxFLP vs. NP2631, UAS>stop>CsChrimson							NP2631, UAS>stop>CsChrimson, dsxFLP vs. NP2631, UAS>stop>CsChrimson
3.36359e-08							2.34956e-11							4.79095e-08							Across-genotype comparison							Across-genotype comparison							Across-genotype comparison
NP2631, UAS>stop>CsChrimson, dsxFLP vs. UAS>stop>CsChrimson, dsxFLP							NP2631, UAS>stop>CsChrimson, dsxFLP vs. UAS>stop>CsChrimson, dsxFLP							NP2631, UAS>stop>CsChrimson, dsxFLP vs. UAS>stop>CsChrimson, dsxFLP
2.42575e-09							2.34956e-11							2.14766e-07							Kruskal-Walis one-way ANOVA ('kruskalwallis')							Kruskal-Walis one-way ANOVA ('kruskalwallis')							Kruskal-Walis one-way ANOVA ('kruskalwallis')
																					0.00765644							N/A							2.49544e-06
																					Mann-Whitney U test ('ranksum')														Mann-Whitney U test ('ranksum')
																					NP2631, UAS>stop>CsChrimson, dsxFLP vs. NP2631, UAS>stop>CsChrimson														NP2631, UAS>stop>CsChrimson, dsxFLP vs. NP2631, UAS>stop>CsChrimson
																					0.00170549														8.49597e-07
																					NP2631, UAS>stop>CsChrimson, dsxFLP vs. UAS>stop>CsChrimson, dsxFLP														NP2631, UAS>stop>CsChrimson, dsxFLP vs. UAS>stop>CsChrimson, dsxFLP
																					0.464907														0.234653

## Sheet: Figure2C
Figure 2
C1 (Time orienting (sec/min))													C2 (Lunges/minutes)													C3 (Wing extension (sec/min))
♂ NP2631, UAS>stop>CsChrimson, dsxFLP, fruP1.LexA, LexAop2-GAL80				♂ NP2631, UAS>stop>CsChrimson, dsxFLP, LexAop2-GAL80				♂ NP2631, UAS>stop>CsChrimson, dsxFLP, fruP1.LexA					♂ NP2631, UAS>stop>CsChrimson, dsxFLP, fruP1.LexA, LexAop2-GAL80				♂ NP2631, UAS>stop>CsChrimson, dsxFLP, LexAop2-GAL80				♂ NP2631, UAS>stop>CsChrimson, dsxFLP, fruP1.LexA					♂ NP2631, UAS>stop>CsChrimson, dsxFLP, fruP1.LexA, LexAop2-GAL80				♂ NP2631, UAS>stop>CsChrimson, dsxFLP, LexAop2-GAL80				♂ NP2631, UAS>stop>CsChrimson, dsxFLP, fruP1.LexA
Window 1 (pre-stimulation)	Window 2 (during stimulation)	Window 3 (ISIs)	Window 4 (total post-stimulation)	Window 1 (pre-stimulation)	Window 2 (during stimulation)	Window 3 (ISIs)	Window 4 (total post-stimulation)	Window 1 (pre-stimulation)	Window 2 (during stimulation)	Window 3 (ISIs)	Window 4 (total post-stimulation)		Window 1 (pre-stimulation)	Window 2 (during stimulation)	Window 3 (ISIs)	Window 4 (total post-stimulation)	Window 1 (pre-stimulation)	Window 2 (during stimulation)	Window 3 (ISIs)	Window 4 (total post-stimulation)	Window 1 (pre-stimulation)	Window 2 (during stimulation)	Window 3 (ISIs)	Window 4 (total post-stimulation)		Window 1 (pre-stimulation)	Window 2 (during stimulation)	Window 3 (ISIs)	Window 4 (total post-stimulation)	Window 1 (pre-stimulation)	Window 2 (during stimulation)	Window 3 (ISIs)	Window 4 (total post-stimulation)	Window 1 (pre-stimulation)	Window 2 (during stimulation)	Window 3 (ISIs)	Window 4 (total post-stimulation)
4.53333	23.5556	8.70833	13.6574	14.8167	42.6944	27.7639	32.7407	6.15	37.9833	9.16389	18.7704		0	0	0	0	0	12.3333	2.83333	6	0	33	1.33333	11.8889		0.466667	5.26111	0.158333	1.85926	0.466667	0.366667	0.405556	0.392593	0	1.30556	0.075	0.485185
4.13333	26.8889	19.2389	21.7889	13.4	35.4944	12.5556	20.2019	7.06667	10.1167	5.96111	7.3463		0	0	0	0	0	0.333333	0	0.111111	0	0	0	0		0	0	0.35	0.233333	0	2.17778	0.236111	0.883333	0.433333	0.838889	0.0527778	0.314815
41.8333	15.6111	2.46667	6.84815	8.28333	36.9833	23.2361	27.8185	1.65	18.7222	16.7083	17.3796		0	0	0	0	0	4.66667	3.83333	4.11111	0	7	2.83333	4.22222		0	0.355556	0	0.118519	0	0.805556	0.302778	0.47037	0.266667	0.438889	0.533333	0.501852
16.5	1.94444	7.92222	5.92963	19.65	40.45	39.8806	40.0704	3.56667	28.0389	3.03333	11.3685		0	0	0	0	0	5	2.66667	3.44444	0	9	0.333333	3.22222		0	0	0	0	0.383333	1.75	0.822222	1.13148	0	2.18889	0.1	0.796296
5.65	7.57222	6.49722	6.85556	4.81667	40.2389	29.9083	33.3519	7.51667	5.68889	7.88889	7.15556		0	0	0	0	0	6	0.5	2.33333	0	0	0.166667	0.111111		0	0.0777778	0.147222	0.124074	0.983333	10.8167	4.86667	6.85	0	0.511111	0.641667	0.598148
18.25	24.9278	10.0306	14.9963	7.01667	21.8611	8.20278	12.7556	1.01667	20.9667	4.98056	10.3093		0	0	0	0	0	0.333333	0	0.111111	0	3.33333	0.333333	1.33333		0	0.772222	0.316667	0.468519	0	1.05556	0.494444	0.681481	0	2.77778	0.102778	0.994444
8.53333	6.18889	3.83056	4.61667	14.1333	48.0556	12.4028	24.287	20.9333	36.7778	8.84444	18.1556		0	0	0	0	0	9	1	3.66667	0	19.6667	2.16667	8		0	0	0	0	0	0.505556	0.0361111	0.192593	0	6.07222	0.105556	2.09444
26.9667	4.64444	8.33889	7.10741	0	27.5056	17.6333	20.9241	6	27.3056	21.4472	23.4		0	0	0	0	0	1.66667	1.16667	1.33333	0	13	6.66667	8.77778		0	0	0.0805556	0.0537037	0	4.65	0.719444	2.02963	0	1.10556	1.60556	1.43889
0	3.07778	8.15833	6.46481	5.58333	37.9278	39.7056	39.113	0	23.1833	4.77778	10.913		0	0.333333	0	0.111111	0	10.6667	5.16667	7	0	4.66667	0	1.55556		0	0.377778	0	0.125926	0	8.82222	4.13333	5.6963	0	0.533333	0	0.177778
2.38333	24.85	26.9528	26.2519	17.65	30.8778	21.1472	24.3907	9.23333	16.8389	6.36111	9.8537		0	0	0	0	0	0.666667	0	0.222222	0	0.666667	0	0.222222		0	0.138889	0	0.0462963	0	2.22778	0.469444	1.05556	0.166667	1.91667	0.591667	1.03333
7.28333	34.7444	24.6028	27.9833	3.61667	8.86111	4.14722	5.71852	4.83333	22.9167	5.825	11.5222		0	17.3333	6.5	10.1111	0	0	0	0	0	11.3333	1.16667	4.55556		0	0	0.297222	0.198148	0	0.138889	0.211111	0.187037	0	2.02222	0.277778	0.859259
0.7	17.6722	15.4917	16.2185	2.85	45.0611	16.5667	26.0648	8.11667	34.05	7.83333	16.5722		0	7.66667	4.33333	5.44444	0	5.66667	0.833333	2.44444	0	25.6667	2.33333	10.1111		0	0	0	0	0.183333	3.22222	0.733333	1.56296	0	1.45556	0.388889	0.744444
1.86667	24.6944	9.91944	14.8444	2.53333	12.8833	6.70278	8.76296	2.4	44.7722	18.5472	27.2889		0	4.66667	0	1.55556	0	0	0	0	0	30	8	15.3333		0.2	0	0	0	0	0	0	0	0	0.177778	0.161111	0.166667
10.55	13.0778	5.84722	8.25741	35.6833	48.2889	28.1639	34.8722	5.26667	30.9056	10.6278	17.387		0	1	0	0.333333	0	14.3333	2.83333	6.66667	0	16	2.16667	6.77778		0	0.388889	0	0.12963	0	2.57778	1.23889	1.68519	0	1.04444	0.130556	0.435185
7.3	17.3056	4.36111	8.67593	3.2	53.1944	30.0889	37.7907	1	17.4278	9.64444	12.2389		0	0	0	0	0	12.3333	5.33333	7.66667	0	8.66667	2.16667	4.33333		0	1.04444	0.0611111	0.388889	0	9.25	1.04444	3.77963	0	0.655556	0.919444	0.831481
17.0167	6.77222	7.40278	7.19259	4.9	23.2667	14.3583	17.3278	1.98333	6.68889	8.29167	7.75741		0	0	0	0	0	1.66667	0	0.555556	0	0	0	0		0	0	0	0	0.633333	1.49444	0.527778	0.85	0	3.71667	0.261111	1.41296
5.88333	11.9	11.0694	11.3463	9.7	20.9667	11.5861	14.713	6.56667	19.3	3.52222	8.78148		0	0	0	0	0	0.333333	0	0.111111	0	0.333333	0	0.111111		0.616667	0.255556	0.713889	0.561111	0	0	0	0	0	0.494444	0.0194444	0.177778
18.1167	24.6944	28.3806	27.1519	3	27.4111	20.375	22.7204	0	10.9278	9.26111	9.81667		0	4.33333	0.5	1.77778	0	1.66667	0	0.555556	0	0	0.166667	0.111111		0	0	0	0	0	0	0	0	0	0.777778	1.10556	0.996296
6.35	13.8167	5.38333	8.19444	6.98333	37.6556	30.3111	32.7593	6.46667	4.40556	4.85278	4.7037		0	1.66667	0.333333	0.777778	0	9.66667	2	4.55556	0	0.333333	1	0.777778		0	0	0.144444	0.0962963	0	3.52778	0.455556	1.47963	0	0	0.505556	0.337037
23.4667	11.0667	10.9889	11.0148	6.35	35.0167	32.4111	33.2796	4.48333	33.1111	12.8889	19.6296		0	0.666667	0	0.222222	0	7	1.33333	3.22222	0	6	0.666667	2.44444		1.15	0.116667	0	0.0388889	0	2.45556	0.2	0.951852	0	0.855556	0	0.285185
16.7833	13.2889	11.575	12.1463	5.23333	23.0722	15.3611	17.9315	1.56667	11.0833	6.17778	7.81296		0	0	0	0	0	0	0	0	0	0.666667	0	0.222222		0	0	0	0	0.783333	0.722222	0.497222	0.572222	2.16667	0	0	0
11.85	6.53889	7.71389	7.32222	10.9	40.1444	21.0583	27.4204	5.1	15.3611	4.69722	8.25185		0	0	0	0	0	8	1	3.33333	0	6	0.166667	2.11111		0	0	0	0	0.45	2.06111	0.847222	1.25185	0	1.05556	0.372222	0.6
7.45	6.66667	10.3528	9.12407	6.68333	48.45	41.1472	43.5815	9.31667	5.67222	8.74167	7.71852		0	0	0	0	0	32.6667	13.3333	19.7778	0	0	0	0		0	0	0.025	0.0166667	0	5.77222	2.82778	3.80926	0	0.622222	1.22778	1.02593
9.36667	9.47778	5.05	6.52593	7.53333	34.4667	25.1222	28.237	3.38333	28.0389	7.67778	14.4648		0	0	0	0	0	6.66667	1.66667	3.33333	0	9	2.16667	4.44444		0	0.483333	0	0.161111	0	3.08889	0.808333	1.56852	0.5	3.94444	0.283333	1.5037
2.2	3.88889	10.6306	8.38333	7.18333	23.9722	13.6083	17.063	6.68333	27.05	18.6167	21.4278		0	0	0	0	0	6	1.5	3	0	19.3333	6.33333	10.6667		0.2	0.0666667	0.0555556	0.0592593	0	1.21667	0.0638889	0.448148	0	2.12778	0.494444	1.03889
6.55	4.82222	4.40556	4.54444	0	15.6333	18.0056	17.2148	6.23333	32.5778	8.93056	16.813		0	0	0	0	0	0	0	0	0	18	2.33333	7.55556		0	0.372222	0.0472222	0.155556	0	0.327778	0.366667	0.353704	0	8.32778	0.241667	2.93704
9.05	6.75	9.19722	8.38148	14.9667	31.5722	21.6361	24.9481	2.38333	43.5	10.8667	21.7444		0	0.666667	0.666667	0.666667	0	13.6667	1.83333	5.77778	0	7.66667	0.333333	2.77778		0	0.372222	0	0.124074	0	0.55	0.236111	0.340741	0	0.394444	0.247222	0.296296
6.16667	3.35	6.56667	5.49444	4.55	35.3778	29.8722	31.7074	14.25	23.0222	12.4722	15.9889		0	0	0	0	0	13.6667	5.83333	8.44444	0	1.66667	1.16667	1.33333		0	0	0	0	0	2.7	0.902778	1.50185	0.466667	5.56111	2.48333	3.50926
4.91667	12.2889	5.6	7.82963	9.4	22.8278	13.8083	16.8148	3.63333	42.5222	17.2611	25.6815		0	0	0	0	0	0	0	0	0	25	4.16667	11.1111		0	0	0	0	0	1.23333	0.361111	0.651852	0	0.544444	0.075	0.231481
14.7667	8.08889	7.41667	7.64074	0	38.1944	31.2861	33.5889	16.75	4.22222	2.05556	2.77778		0	0	0	0	0	10	3.16667	5.44444	0	0	0	0		0	0	0.0388889	0.0259259	0	1.93333	0.652778	1.07963	0	0.1	0.127778	0.118519
25.8833	7.18333	6.67778	6.8463	4.8	33.3611	18.7194	23.6	14.1333	20.1278	4.78333	9.89815		0	0	0	0	0	2.33333	0.666667	1.22222	0	0	0	0		0	0	0.0833333	0.0555556	0	0.411111	0.433333	0.425926	0	0.472222	0.427778	0.442593
16.2333	17.8222	6.175	10.0574	4.66667	40.9833	10.1917	20.4556	8.25	23.1667	7.97222	13.037		0	0.333333	0	0.111111	0	1	0.166667	0.444444	0	14.3333	1.16667	5.55556		0	0	0	0	0.766667	3.12778	0	1.04259	0	0.622222	0	0.207407
9.83333	33.5944	17.9389	23.1574	3.15	36.6222	17.8028	24.0759	5.55	14.65	0.405556	5.1537		0	17.3333	8.16667	11.2222	0	6.33333	1.83333	3.33333	0	5	0	1.66667		0.233333	0	0	0	0	2.93333	0	0.977778	0	0	0	0
10.95	6.17778	7.675	7.17593	1.81667	12.0833	21.6556	18.4648						0	0	0	0	0	1.66667	1.5	1.55556						0	0	0	0	0	0	0.0583333	0.0388889
4.78333	16.0056	5.15278	8.77037										0	0.333333	0	0.111111										0	2.63333	0.0638889	0.92037
3.1	2.47778	6.03333	4.84815										0	0	0	0										0	0	0.183333	0.122222
Within genotype NP2631, UAS>stop>CsChrimson, dsxFLP, fruP1.LexA, LexAop2-GAL80 :				Within genotype NP2631, UAS>stop>CsChrimson, dsxFLP, LexAop2-GAL80 :				Within genotype NP2631, UAS>stop>CsChrimson, dsxFLP, fruP1.LexA :					Within genotype NP2631, UAS>stop>CsChrimson, dsxFLP, fruP1.LexA, LexAop2-GAL80 :				Within genotype NP2631, UAS>stop>CsChrimson, dsxFLP, LexAop2-GAL80 :				Within genotype NP2631, UAS>stop>CsChrimson, dsxFLP, fruP1.LexA :					Within genotype NP2631, UAS>stop>CsChrimson, dsxFLP, fruP1.LexA, LexAop2-GAL80 :				Within genotype NP2631, UAS>stop>CsChrimson, dsxFLP, LexAop2-GAL80 :				Within genotype NP2631, UAS>stop>CsChrimson, dsxFLP, fruP1.LexA :
Statistical comparisons among time windows 1-3				Statistical comparisons among time windows 1-3				Statistical comparisons among time windows 1-3					Statistical comparisons among time windows 1-3				Statistical comparisons among time windows 1-3				Statistical comparisons among time windows 1-3					Statistical comparisons among time windows 1-3				Statistical comparisons among time windows 1-3				Statistical comparisons among time windows 1-3
Kruskal-Walis one-way ANOVA ('kruskalwallis') among windows 1-3				Kruskal-Walis one-way ANOVA ('kruskalwallis') among windows 1-3				Kruskal-Walis one-way ANOVA ('kruskalwallis') among windows 1-3					Kruskal-Walis one-way ANOVA ('kruskalwallis') among windows 1-3				Kruskal-Walis one-way ANOVA ('kruskalwallis') among windows 1-3				Kruskal-Walis one-way ANOVA ('kruskalwallis') among windows 1-3					Kruskal-Walis one-way ANOVA ('kruskalwallis') among windows 1-3				Kruskal-Walis one-way ANOVA ('kruskalwallis') among windows 1-3				Kruskal-Walis one-way ANOVA ('kruskalwallis') among windows 1-3
0.321608				2.36964e-13				1.87137e-09					0.000843199				6.41118e-12				4.39427e-11					0.0520613				9.21262e-10				1.47617e-10
				Wilcoxon signed rank test ('signrank')				Wilcoxon signed rank test ('signrank')					Wilcoxon signed rank test ('signrank')				Wilcoxon signed rank test ('signrank')				Wilcoxon signed rank test ('signrank')									Wilcoxon signed rank test ('signrank')				Wilcoxon signed rank test ('signrank')
				1 vs. 2	2 vs. 3			1 vs. 2	2 vs. 3				1 vs. 2	2 vs. 3			1 vs. 2	2 vs. 3			1 vs. 2	2 vs. 3								1 vs. 2	2 vs. 3			1 vs. 2	2 vs. 3
				3.65283e-07	2.47608e-06			3.24658e-06	2.2894e-06				0.000488281	0.000976562			2.53388e-06	2.55274e-06			8.27032e-06	9.94471e-06								2.35342e-06	4.96871e-06			1.13491e-05	0.000288558
Across-genotype comparison													Across-genotype comparison													Across-genotype comparison
Kruskal-Walis one-way ANOVA ('kruskalwallis')													Kruskal-Walis one-way ANOVA ('kruskalwallis')													Kruskal-Walis one-way ANOVA ('kruskalwallis')
2.96336e-11													2.81042e-06													1.88387e-06
Mann-Whitney U test ('ranksum')													Mann-Whitney U test ('ranksum')													Mann-Whitney U test ('ranksum')
All elements present vs. "no fruP1.LexA"													All elements present vs. "no fruP1.LexA"													All elements present vs. "no fruP1.LexA"
1.87886e-08													6.97232e-06													1.79649e-07
All elements present vs. "no LexAop2-GAL80"													All elements present vs. "no LexAop2-GAL80"													All elements present vs. "no LexAop2-GAL80"
0.0301392													5.62532e-06													1.71012e-07

## Sheet: FigureS2-1C
Figure 2 - figure supplement 1
C1 (Time orienting (sec/min))										C2 (Lunges/minutes)										C3 (Wing extension (sec/min))
♂ NP2631, UAS>stop>CsChrimson, dsxFLP										♂ NP2631, UAS>stop>CsChrimson, dsxFLP										♂ NP2631, UAS>stop>CsChrimson, dsxFLP
Window 2 (during stimulation)					Window 4 (total post-stimulation)					Window 2 (during stimulation)					Window 4 (total post-stimulation)					Window 2 (during stimulation)					Window 4 (total post-stimulation)
30Hz	10Hz	5Hz	2Hz		30Hz	10Hz	5Hz	2Hz		30Hz	10Hz	5Hz	2Hz		30Hz	10Hz	5Hz	2Hz		30Hz	10Hz	5Hz	2Hz		30Hz	10Hz	5Hz	2Hz
41.2278	12.85	31.0278	20.7889		28.1685	13.0259	18.9574	13.2981		1	0.666667	0.666667	0		3	1.55556	0.333333	0		13.7389	1.63889	2.72778	0.772222		4.79444	1.02963	1.20185	0.451852
10.6722	26.8333	45.1111	19.2722		7.33333	27.3315	37.9463	16.7685		0	9	2.66667	0		0	9.55556	3.22222	0		0.372222	1.24444	4.16111	0.872222		0.272222	0.762963	2.55185	0.290741
18.5611	12.5556	10.9778	30.2722		22.2889	16.0426	11.663	19.0093		12.6667	2	0	1		11.5556	2	0.111111	0.444444		1.83889	1.42222	0.0388889	3.12222		0.87963	0.751852	0.157407	1.04074
38.6611	32.7278	39.1944	13.0278		20.5111	20.1611	23.1204	5.68889		9	9.33333	0	0		4.55556	6.88889	0	0		13.8611	1.19444	31.1833	0.4		4.71852	0.65	12.3667	0.235185
37.4778	44.9389	33.7333	23.8389		18.2148	24.913	17.1148	14.1296		8	14	2.33333	3.66667		3	6.88889	0.888889	1.22222		6.7	6.58333	11.7722	2.43333		2.3	2.49074	5.10926	0.940741
29.1167	31.7333	34.1111	11.5333		24.1907	23.9833	17.8296	6.63148		1.66667	4	0	0		0.555556	4.22222	0.111111	0		0	5.32222	16.0944	1.60556		0.153704	1.92593	6.50926	0.968519
40.65	54.9389	47.0944	25.5444		24.3685	29.9426	28.2889	12.1		3.33333	2.33333	7	16.3333		2.55556	1.88889	3.55556	6.11111		7.48889	15.2278	5.16667	0.6		2.90741	5.72037	1.72222	0.305556
11.4667	54.4333	25.2333	51.5278		11.2741	32.4463	19.3981	33.0093		0	5.33333	6	2		0	2.66667	2.22222	1.55556		0.183333	1.45556	1.87222	16.4		0.0740741	0.664815	0.916667	10.6444
49.0056	33.8611	48.7556	47.4611		33.2148	18.2815	24.2148	33.7426		18.6667	7.33333	29	12		10.5556	3	13.5556	6		1.13333	4.96111	13.5556	9.66667		0.487037	2.40185	4.69074	5.23148
43.1444	29.1111	22.2667	33.1056		24.6167	12.6185	16.1278	20.0611		2	1.33333	5.33333	0		0.777778	0.444444	2	0		6.88333	2.71667	1.48889	1.42778		2.78519	0.925926	0.496296	0.725926
41.8111	30.5111	18.1722	12.6611		22.8296	15.3444	12.3241	5.1537		34.6667	0	14	0		15.1111	0	4.77778	0		1.61111	0.788889	0.55	0.822222		0.607407	0.262963	0.183333	0.274074
48.6556	17.4389	43.3667	36.8944		40.363	21.5296	24.8704	18.3222		35.3333	0.666667	5.33333	3.66667		18.5556	0.222222	2.11111	1.44444		3.07778	0.0888889	4.7	1.77222		2.91667	0.266667	2.26481	0.65
24.3111	0	55.4611	9.48889		18.1667	11.113	31.8019	7.38519		3.33333	0	6	0		2.66667	0.666667	2.55556	0.111111		0.538889	0	4.4	0.916667		0.222222	0.974074	1.93148	0.62963
15.7833	35.2278	38.8833	22.5167		12.1648	18.7926	31.9019	21.6981		0.666667	3.66667	1.33333	2.66667		0.777778	1.44444	1	1.55556		0.422222	12.8833	6.83333	2.2		0.325926	5.23704	3.26111	0.733333
0	36.6944	28.6333	13.8222		10.2019	25.1296	14.9463	5.41667		0	0	0	0		0.888889	0.111111	0	0		0	1.69444	0	0.911111		0.2	1.39444	0.0407407	0.32037
37.1833	48	10.2833	20.4		23.2352	25.7019	11.1907	10.863		0	16.6667	1.33333	0		0	8.22222	1.11111	0		7.88889	3.19444	2.67222	1.52222		3.21667	1.24259	1.09444	0.507407
16.7444	28.0278	23.15	55.1722		17.6926	14.2111	16.3315	28.6685		0	14	0.666667	14.3333		0	6	0.333333	4.77778		3.03889	0.566667	9.94444	2.02778		1.05	0.188889	3.80556	0.785185
11.6556	34.5444	44.3833	25.8944		11.9889	17.2352	25.8574	14.687		0	11.6667	7.33333	2.66667		0	3.88889	5.88889	0.888889		1.41111	3.01667	4.37778	4.90556		0.47037	1.03148	2.50185	1.85556
7.83333	33.4278	51.2556	6.93889		20.5111	22.6	33.0852	4.49074		0	3.66667	7	0		0	3.33333	2.55556	0		0	3.7	1.2	0.0611111		0.32037	2.33704	0.844444	0.087037
9.29444	51.4056	37.7889	8.27778		18.7185	40.0407	18.2037	3.8537		1.33333	2.66667	4.66667	0.333333		5.77778	2.11111	2.22222	0.111111		1.35	5.91667	4.62778	0.238889		0.562963	2.92963	1.72593	0.161111
12.9444	55.4556	47.7167	26.1778		14.6722	28.8926	29.9741	13.4333		0	3	14.3333	0		0.555556	1.11111	6.88889	0		1.63333	5.31111	10.7778	4.16667		1.08519	1.82593	5.23148	1.90556
4.46111	41.4389	31.2833	8.08889		6.69444	26.1796	16.5481	8.23148		0	12.6667	5.66667	0		0.111111	5.44444	2.44444	0		0.0722222	1.66667	8.62778	0.833333		0.153704	0.655556	3.11296	0.940741
28.5722	30.4056	40.3333	49.3111		16.0759	24.9796	20.3389	33.2815		0.333333	3.66667	4.66667	16.6667		0.111111	4.44444	2.88889	7.88889		3.6	3.54444	9.95556	1.23333		1.22222	1.30926	3.86111	1.51111
25.2944	34.4333	55.8722	44.3167		10.4981	22.3833	45.1519	28.1741		1.66667	3	8.66667	4.66667		0.666667	3.55556	5.33333	3.77778		0	4.4	6.96111	3.17222		0.338889	2.12037	3.51481	1.34074

## Sheet: FigureS2-2C,D,H
Figure 2 - figure supplement 2
	C (# of cells)										H (# of cells)
	DsM+, FruM+	DsxM+, FruM-	DsM-, FruM+	DsxM-, FruM-	NP2631 ∩ dsxFLP Total		NP2631, UAS>stop>CsChrimson (VK00022), dsxFLP, +/+		Ratio			NP2631, UAS>stop>CsChrimson (VK00022), dsxFLP			NP2631, UAS>stop>CsChrimson (VK00005), dsxFLP, fruP1.LexA, LexAop2-GAL80	NP2631, UAS>stop>CsChrimson (VK00005), dsxFLP, LexAop2-GAL80	NP2631, UAS>stop>CsChrimson (VK00005), dsxFLP, fruP1.LexA
	2	3	0	0	5		D1					Total	FruM+	FruM-
	5	3	0	2	10		1 descending neuron	8	0.290323		(Column #)	1	2	3	4	5	6
	0	0	0	0	0		No descending neuron	15	0.709677			5	3	2	2	3	4
	1	1	0	0	2							3	1	2	3	7	6
	1	1	0	0	2		D2 (behavior data from Figure 3 - figure supplement 1I2)					6	3	3	3	1	4
	2	3	0	0	5		Lunge increased in window 2 relative to window 1	28	0.875			4	2	2	3	2	3
	2	2	0	0	4		Lunge not increased in window 2 relative to window 1	4	0.125			6	1	5	3	6	5
	1	4	0	0	5		Fisher's exact test ('fishertest) against descending neuron frequency (D1)	0.000107241				4	1	3	4	5	5
	0	3	0	0	3							5	1	4	2	5	4
	2	3	0	0	5		Lunge increased in window 2 relative to window 3	23	0.71875			4	2	2	3	7	6
	2	2	0	0	4		Lunge not increased in window 2 relative to window 3	9	0.28125			6	1	5	2	5	5
	5	3	0	0	8		Fisher's exact test ('fishertest) against descending neuron frequency (D1)	0.012311				6	3	3	1	5	5
	2	5	0	0	7							5	1	4	5	6	3
	1	2	0	1	4		D3 (behavior data from Figure 3 - figure supplement 1I3)					6	2	4	6	6	9
AVERAGE	1.85714	2.5	0	0.214286	4.57143		Wing extension increased in window 2 relative to window 1	28	0.777778			3	1	2	4	3	6
S.D.	1.51186	1.28602	0	0.578934	2.56348		Wing extension not increased in window 2 relative to window 1	8	0.222222			3	0	3	2	8	7
							Fisher's exact test ('fishertest) against descending neuron frequency (D1)	0.00218668				6	1	5	4
												8	2	6	3
							Wing extension increased in window 2 relative to window 3	26	0.722222		AVERAGE	5	1.5625	3.4375	3.125	4.92857	5.14286
							Wing extension not increased in window 2 relative to window 3	10	0.277778		S.D.	1.41421	0.892095	1.31498	1.25831	2.01778	1.61041
							Fisher's exact test ('fishertest) against descending neuron frequency (D1)	0.0068586
													Comparison between columns 3 and 4 ('ttest')
													0.343158
													One-way ANOVA ('anova1') among genotypes
													0.00184611
													Tukey's honest significant difference test ('hsd'): p-value table
													(Significant group, p < 0.05)	a	b	a	a
													(Column #)	1	4	5	6
													1		0.00771388	0.999322	0.994675
													4			0.0150414	0.00522522
													5				0.984111
													6

[truncated: 15 more sheets: FigureS2-3A,B, Figure3D, Figure3L-N, FigureS3-1I, Figure4A,B, Figure4C, Figure5B,D, FigureS5-1A,B, FigureS5-1D, FigureS5-2A, FigureS5-2B, FigureS5-3B,D, Figure6E,H,I, FigureS6-1G, FigureS6-2A,B]
